# Supplementary material for: Exclusive Enteral Nutrition Orchestrates Immunological Balances as Early as Week 4 in Adult Patients of Crohn’s Disease: A Pilot, Open-Lable Study
Source: MDPI journal article supplement (doi:10.3390/nu15245091), 2023-12-13
Supplement: s1 [file s1]

Supplementary Materials

# Exclusive Enteral Nutrition Orchestrates Immunological Balances as Early as Week 4 in Adult Patients of Crohn's Disease: A Poilt, Open-lable Study

Na Diao <sup>1,2,3,†</sup>, Xinyu Liu <sup>1,2,3,†</sup>, Minzhi Lin <sup>1,2,3</sup>, Qingfan Yang <sup>1,2,3</sup>, Bingyang Li <sup>1,2,3</sup>, Jian Tang <sup>1,2,3</sup>, Ni Ding <sup>1,2,3</sup>, Xiang Gao <sup>1,2,3,\*</sup> and Kang Chao <sup>1,2,3,\*</sup>

**Table S1.** Composition Amount of Elental<sup>®</sup> per package.

| Total                 | 80g (300 kcal) | Amino acids                      | 14.08g    |
|-----------------------|----------------|----------------------------------|-----------|
| Amino acids           | 14.08          | L-Isoleucine                     | 642.40mg  |
| Carbohydrate(dextrin) | 63.41g         | L-Leucine                        | 899.20mg  |
| Lipid (soybean oil)   | 0.51g          | L-Lysine-HCl                     | 888.00mg  |
| Vitamin A             | 648.00 IU      | L-Methionine                     | 648.00mg  |
| Vitamin D             | 51.20 IU       | L-Phenylalanine                  | 871.20mg  |
| Vitamin B1            | 0.19 mg        | L-Threonine                      | 523.20mg  |
| Vitamin B2            | 0.20 mg        | L-Tryptophan                     | 151.20mg  |
| Vitamin B6            | 0.26 mg        | L-Valine                         | 700.80mg  |
| Niacin                | 2.22 mg        | L-Histidine-HCl-H <sub>2</sub> O | 500.80mg  |
| Pantothenic acid      | 1.10 mg        | L-Arginine-HCl                   | 1124.80mg |
| Folic acid            | 44.00 ug       | L-Alanine                        | 899.20mg  |
| Vitamin B12           | 0.70 ug        | Mg-K-L-Aspartate                 | 1036.00mg |
| Vitamin C             | 7.80 mg        | Na-L-Aspartate-H <sub>2</sub> O  | 867.20mg  |
| Vitamin K             | 9.04 ug        | L-Glutamine                      | 1932.00mg |
| Vitamin E             | 3.30 IU        | Glycine                          | 504.80mg  |
| Biotin                | 38.04 ug       | L-Proline                        | 630.40mg  |
| Choline               | 8.56 mg        | L-Serine                         | 1159.20mg |
| Na                    | 260.00 mg      | L-Tyrosine                       | 110.40mg  |
| K                     | 217.60 mg      |                                  |           |
| Cl                    | 516.80 mg      |                                  |           |
| Mg                    | 40.00 mg       |                                  |           |
| Ca                    | 157.60 mg      |                                  |           |
| P                     | 121.6 mg       |                                  |           |
| Fe                    | 1.80mg         |                                  |           |
| I                     | 15.20ug        |                                  |           |
| Mn                    | 300.00ug       |                                  |           |
| Cu                    | 200.00ug       |                                  |           |
| Zn                    | 1.80ug         |                                  |           |

Abbreviations: Na, sodium; K, potassium; Cl, chlorine; Mg, magnesium; Ca, calcium; P, phosphorus; Fe, iron; I, iodine; Mn, manganese; Cu, copper; Zn, zinc.
